# Supplementary material
Source: Research Square preprint supplement (doi:10.21203/rs.3.rs-9116861/v1)
Supplement: Supplementary file 1 [file 5898d015d2a3e3d655cc5010.pdf]

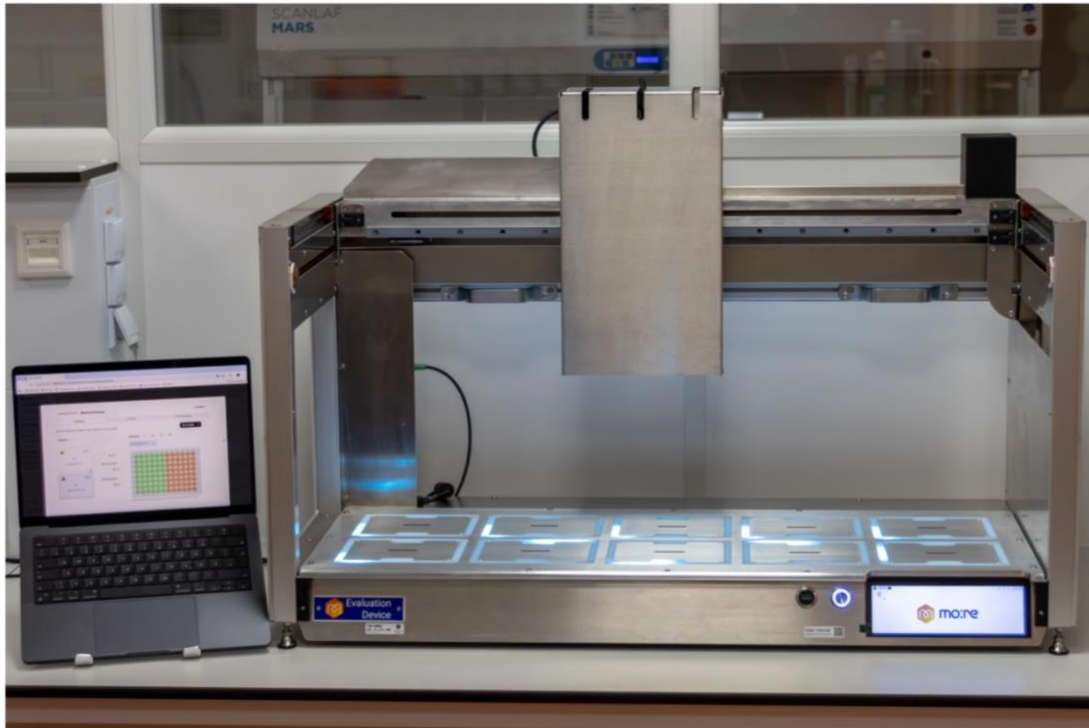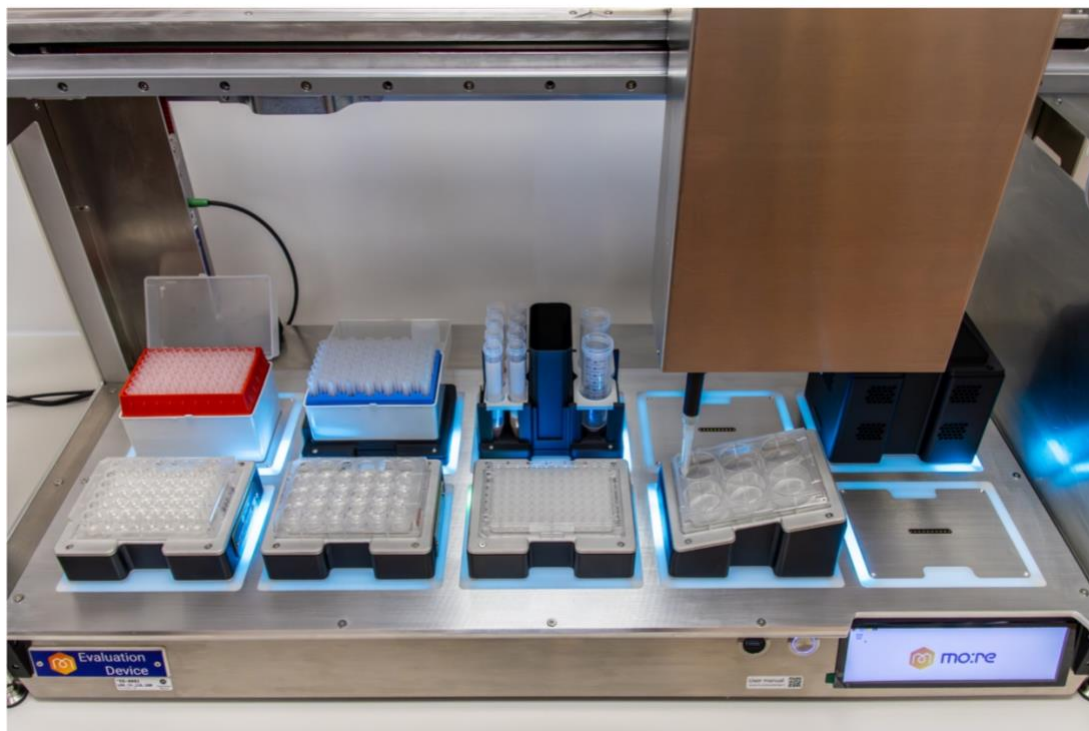

**Supplementary Figure 1:** Representative photographs of the MO:BOT without integrated modules (top) and with modules install (bottom).

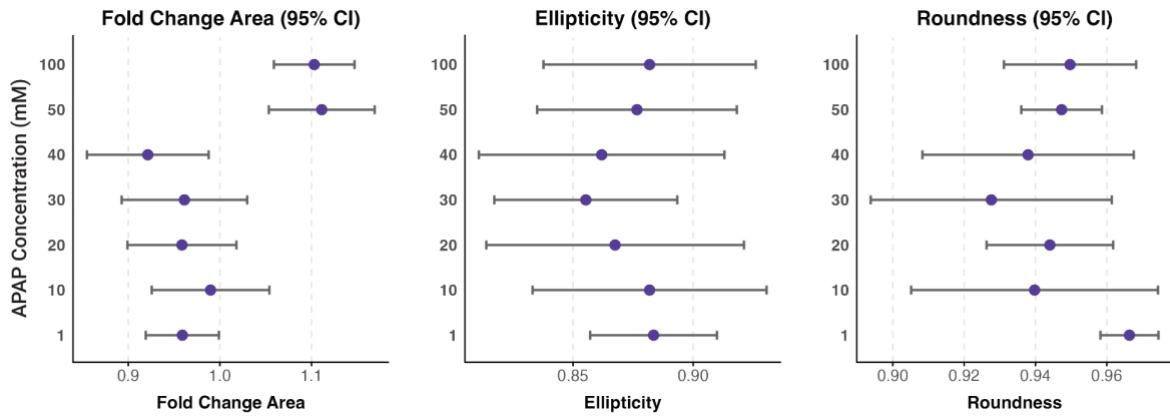

**Supplementary Figure 2:** Fold change area (left), ellipticity (centre), and roundness (right) of liver spheroids following exposure to acetaminophen (APAP) at indicated concentrations. Points represent means; error bars indicate 95% confidence intervals. Only fold change area at APAP concentrations of 100 and 50 mM show a meaningful difference relative to concentrations of 1 – 40 mM.
